# Supplementary material for: Evolution of antibody titers after two doses of mRNA Pfizer-BioNTech vaccine and effect of the third dose in nursing home residents
Source: PubMed Central journal article supplement (PMC9994681; doi:10.1371/journal.pone.0282388), 2023-03-08
Supplement: pone.0282388.s001.pdf [file pone.0282388.s001.pdf]

## ENCUESTA ESTUDIO POSTVACUNACIÓN.

**NOMRE Y APELLIDOS:**

**FECHA DE NACIMIENTO:**

1.- Ha pasado la COVID?                      SI                                      NO

Si la respuesta es afirmativa, indique la fecha de la infección:

Sintomático    SI                                      NO

### 2.- Vacunación

a.- Indique la fecha en la que se le suministró la vacuna:

1º dosis:

2º dosis:

Efectos secundarios (1º dosis – 2ª dosis):

|                                       |         |         |
|---------------------------------------|---------|---------|
| Dolor en la zona de inoculación       | SI - SI | NO - NO |
| Inflamación en la zona de inoculación | SI - SI | NO - NO |
| Cefalea                               | SI - SI | NO – NO |
| Febrícula                             | SI - SI | NO - NO |
| Fiebre (>38°C)                        | SI - SI | NO - NO |
| Cansancio                             | SI - SI | NO - NO |
| Escalofríos y nauseas                 | SI - SI | NO - NO |
| Mareos                                | SI - SI | NO - NO |
| Adenopatías                           | SI - SI | NO - NO |

Otras (describir):

Ha tomado paracetamol profiláctico (antes de la vacunación):

SI                                      NO

Ha tomado paracetamol sintomático (primeras 24 horas tras la vacunación):

SI                                      NO

**Enfermedades de base/Medicación habitual.**
